# Supplementary material for: Alternative bait trials in the Barents Sea snow crab fishery
Source: PeerJ. 2019 May 13;7:e6874. doi: 10.7717/peerj.6874 (PMC6521814; doi:10.7717/peerj.6874)
Supplement: Supplemental Information 3 — Raw data of the fleets, including fleet number, bait treatment, latitude, longitude, set and haul date. [file peerj-07-6874-s003.csv]

fleet	set	haul	bait	lat	long
45	5/26/2016 12:30	6/2/2016 0:00	SFS	75.93222222	37.05416667
8	5/26/2016 23:00	6/7/2016 7:00	SFS	75.77	37.82
10	5/27/2016 2:00	6/7/2016 9:00	SF	75.77	37.86833333
38	5/27/2016 12:30	6/7/2016 21:00	WMF	76.20166667	37.99
12	5/27/2016 21:30	6/8/2016 10:30	SM	75.32166667	37.99666667
42	5/28/2016 16:00	6/8/2016 23:40	SF	76.41666667	36.20333333
24	5/29/2016 3:00	6/9/2016 3:00	WMF	76.45166667	36.31666667
35	5/28/2016 12:00	6/11/2016 4:30	WFS	76.455	36.93333333
46	6/2/2016 3:00	6/11/2016 23:50	SFS	75.78666667	37.62333333
19	6/7/2016 14:30	6/12/2016 22:00	SF	75.81166667	37.98166667
13	6/8/2016 13:00	6/13/2016 11:30	WMF	76.32166667	37.99666667
18	6/8/2016 21:30	6/13/2016 15:00	SM	76.37333333	37.03333333
1	6/9/2016 16:00	6/14/2016 7:00	WFS	76.42333333	35.84
15	6/9/2016 19:00	6/14/2016 11:00	SFS	76.54	36.475
2	6/10/2016 16:00	6/15/2016 3:00	WFS	76.43	36.40166667
